# Supplementary material for: Phylogeography of the sand dune ant Mycetophylax simplex along the Brazilian Atlantic Forest coast: remarkably low mtDNA diversity and shallow population structure
Source: PubMed Central journal article supplement (PMC4460702; doi:10.1186/s12862-015-0383-4), 2015-06-10
Supplement: 12862_2015_383_MOESM1_ESM.pdf [file 12862_2015_383_MOESM1_ESM.pdf]

**Appendix S1:** Sequence alignments for 372 base pairs of *Mycetophylax simplex* wingless gene from 51 specimens (GenBank accession numbers: KP939178-KP939228). The 51 individuals sequenced here are the same individuals sequenced for COI gene. The alignment included none variable sites and none parsimony informative sites. When phased in the DnaSP program the data show only eight segregating sites and none number of polymorphic segregating sites with more than two variants.

|       | 1 | 10 | 20 | 30 | 40 | 50 | 60 |   |   |   |   |   |   |   |   |   |   |   |   |   |   |   |   |   |   |   |   |   |   |   |   |   |   |   |   |   |   |   |   |   |   |   |   |   |   |   |   |   |   |   |   |   |   |   |   |   |   |   |   |   |   |   |
|-------|---|----|----|----|----|----|----|---|---|---|---|---|---|---|---|---|---|---|---|---|---|---|---|---|---|---|---|---|---|---|---|---|---|---|---|---|---|---|---|---|---|---|---|---|---|---|---|---|---|---|---|---|---|---|---|---|---|---|---|---|---|---|
| mx001 | G | T  | T  | T  | C  | G  | A  | C | G | G | G | G | C | T | T | C | T | C | T | C | G | G | G | T | A | A | T | G | G | T | C | A | G | T | A | A | C | T | C | G | G | A | A | C | G | A | G | C | G | C | G | T | T | A | C | C | A | A | C | A |   |   |
| mx087 | G | T  | T  | T  | C  | G  | A  | C | G | G | G | G | C | T | T | C | T | C | T | C | G | G | G | T | A | A | T | G | G | T | C | A | G | T | A | A | C | T | C | G | G | A | A | C | G | A | G | C | G | C | G | C | G | T | T | A | C | C | A | A | C | A |
| mx035 | G | T  | T  | T  | C  | G  | A  | C | G | G | G | G | C | T | T | C | T | C | T | C | G | G | G | T | A | A | T | G | G | T | C | A | G | T | A | A | C | T | C | G | G | W | R | C | G | W | G | C | G | C | G | C | G | T | T | A | C | C | A | A | C | A |
| mx004 | G | T  | T  | T  | C  | G  | A  | C | G | G | G | G | C | T | T | C | T | C | T | C | G | G | G | T | A | A | T | G | G | T | C | A | G | T | A | A | C | T | C | G | G | W | R | C | G | W | G | C | G | C | G | C | G | T | T | A | C | C | A | A | C | A |
| mx008 | G | T  | T  | T  | C  | G  | A  | C | G | G | G | G | C | T | T | C | T | C | T | C | G | G | G | T | A | A | T | G | G | T | C | A | G | T | A | A | C | T | C | G | G | A | A | C | G | A | G | C | G | C | G | C | G | T | T | A | C | C | A | A | C | A |
| mx042 | G | T  | T  | T  | C  | G  | A  | C | G | G | G | G | C | T | T | C | T | C | T | C | G | G | G | T | A | A | T | G | G | T | C | A | G | T | A | A | C | T | C | G | G | A | A | C | G | A | G | C | G | C | G | C | G | T | T | A | C | C | A | A | C | A |
| mx002 | G | T  | T  | T  | C  | G  | A  | C | G | G | G | G | C | T | T | C | T | C | T | C | G | G | G | T | A | A | T | G | G | T | C | A | G | T | A | A | C | T | C | G | G | A | A | C | G | A | G | C | G | C | G | C | G | T | T | A | C | C | A | A | C | A |
| mx053 | G | T  | T  | T  | C  | G  | A  | C | G | G | G | G | C | T | T | C | T | C | T | C | G | G | G | T | A | A | T | G | G | T | C | A | G | T | A | A | C | T | C | G | G | W | R | C | G | W | G | C | G | C | G | C | G | T | T | A | C | C | A | A | C | A |
| mx109 | G | T  | T  | T  | C  | G  | A  | C | G | G | G | G | C | T | T | C | T | C | T | C | G | G | G | T | A | A | T | G | G | T | C | A | G | T | A | A | C | T | C | G | G | A | A | C | G | A | G | C | G | C | G | C | G | T | T | A | C | C | A | A | C | A |
| mx110 | G | T  | T  | T  | C  | G  | A  | C | G | G | G | G | C | T | T | C | T | C | T | C | G | G | G | T | A | A | T | G | G | T | C | A | G | T | A | A | C | T | C | G | G | A | A | C | G | A | G | C | G | C | G | C | G | T | T | A | C | C | A | A | C | A |
| mx013 | G | T  | T  | T  | C  | G  | A  | C | G | G | G | G | C | T | T | C | T | C | T | C | G | G | G | T | A | A | T | G | G | T | C | A | G | T | A | A | C | T | C | G | G | A | A | C | G | A | G | C | G | C | G | C | G | T | T | A | C | C | A | A | C | A |
| mx034 | G | T  | T  | T  | C  | G  | A  | C | G | G | G | G | C | T | T | C | T | C | T | C | G | G | G | T | A | A | T | G | G | T | C | A | G | T | A | A | C | T | C | G | G | A | A | C | G | A | G | C | G | C | G | C | G | T | T | A | C | C | A | A | C | A |
| mx020 | G | T  | T  | T  | C  | G  | A  | C | G | G | G | G | C | T | T | C | T | C | T | C | G | G | G | T | A | A | T | G | G | T | C | A | G | T | A | A | C | T | C | G | G | A | A | C | G | A | G | C | G | C | G | C | G | T | T | A | C | C | A | A | C | A |
| mx048 | G | T  | T  | T  | C  | G  | A  | C | G | G | G | G | C | T | T | C | T | C | T | C | G | G | G | T | A | A | T | G | G | T | C | A | G | T | A | A | C | T | C | G | G | A | A | C | G | A | G | C | G | C | G | C | G | T | T | A | C | C | A | A | C | A |
| mx045 | G | T  | T  | T  | C  | G  | A  | C | G | G | G | G | C | T | T | C | T | C | T | C | G | G | G | T | A | A | T | G | G | T | C | A | G | T | A | A | C | T | C | G | G | A | A | C | G | A | G | C | G | C | G | C | G | T | T | A | C | C | A | A | C | A |
| mx025 | G | T  | T  | T  | C  | G  | A  | C | G | G | G | G | C | T | T | C | T | C | T | C | G | G | G | T | A | A | T | G | G | T | C | A | G | T | A | A | C | T | C | G | G | A | A | C | G | A | G | C | G | C | G | C | G | T | T | A | C | C | A | A | C | A |
| mx024 | G | T  | T  | T  | C  | G  | A  | C | G | G | G | G | C | T | T | C | T | C | T | C | G | G | G | T | A | A | T | G | G | T | C | A | G | T | A | A | C | T | C | G | G | A | A | C | G | A | G | C | G | C | G | C | G | T | T | A | C | C | A | A | C | A |
| mx044 | G | T  | T  | T  | C  | G  | A  | C | G | G | G | G | C | T | T | C | T | C | T | C | G | G | G | T | A | A | T | G | G | T | C | A | G | T | A | A | C | T | C | G | G | A | A | C | G | A | G | C | G | C | G | C | G | T | T | A | C | C | A | A | C | A |
| mx049 | G | T  | T  | T  | C  | G  | A  | C | G | G | G | G | C | T | T | C | T | C | T | C | G | G | G | T | A | A | T | G | G | T | C | A | G | T | A | A | C | T | C | G | G | A | A | C | G | A | G | C | G | C | G | C | G | T | T | A | C | C | A | A | C | A |
| mx050 | G | T  | T  | T  | C  | G  | A  | C | G | G | G | G | C | T | T | C | T | C | T | C | G | G | G | T | A | A | T | G | G | T | C | A | G | T | A | A | C | T | C | G | G | A | A | C | G | A | G | C | G | C | G | C | G | T | T | A | C | C | A | A | C | A |
| mx051 | G | T  | T  | T  | C  | G  | A  | C | G | G | G | G | C | T | T | C | T | C | T | C | G | G | G | T | A | A | T | G | G | T | C | A | G | T | A | A | C | T | C | G | G | A | A | C | G | A | G | C | G | C | G | C | G | T | T | A | C | C | A | A | C | A |
| mx055 | G | T  | T  | T  | C  | G  | A  | C | G | G | G | G | C | T | T | C | T | C | T | C | G | G | G | T | A | A | T | G | G | T | C | A | G | T | A | A | C | T | C | G | G | A | A | C | G | A | G | C | G | C | G | C | G | T | T | A | C | C | A | A | C | A |
| mx111 | G | T  | T  | T  | C  | G  | A  | C | G | G | G | G | C | T | T | C | T | C | T | C | G | G | G | T | A | A | T | G | G | T | C | A | G | T | A | A | C | T | C | G | G | A | A | C | G | A | G | C | G | C | G | C | G | T | T | A | C | C | A | A | C | A |
| mx069 | G | T  | T  | T  | C  | G  | A  | C | G | G | G | G | C | T | T | C | T | C | T | C | G | G | G | T | A | A | T | G | G | T | C | A | G | T | A | A | C | T | C | G | G | W | R | C | G | W | G | C | G | C | G | C | G | T | T | A | C | C | A | A | C | A |
| mx062 | G | T  | T  | T  | C  | G  | A  | C | G | G | G | G | C | T | T | C | T | C | T | C | G | G | G | T | A | A | T | G | G | T | C | A | G | T | A | A | C | T | C | G | G | W | R | C | G | W | G | C | G | C | G | C | G | T | T | A | C | C | A | A | C | A |
| mx112 | G | T  | T  | T  | C  | G  | A  | C | G | G | G | G | C | T | T | C | T | C | T | C | G | G | G | T | A | A | T | G | G | T | C | A | G | T | A | A | C | T | C | G | G | A | A | C | G | A | G | C | G | C | G | C | G | T | T | A | C | C | A | A | C | A |
| mx065 | G | T  | T  | T  | C  | G  | A  | C | G | G | G | G | C | T | T | C | T | C | T | C | G | G | G | T | A | A | T | G | G | T | C | A | G | T | A | A | C | T | C | G | G | W | R | C | G | W | G | C | G | C | G | C | G | T | T | A | C | C | A | A | C | A |
| mx074 | G | T  | T  | T  | C  | G  | A  | C | G | G | G | G | C | T | T | C | T | C | T | C | G | G | G | T | A | A | T | G | G | T | C | A | G | T | A | A | C | T | C | G | G | A | A | C | G | A | G | C | G | C | G | C | G | T | T | A | C | C | A | A | C | A |
| mx084 | G | T  | T  | T  | C  | G  | A  | C | G | G | G | G | C | T | T | C | T | C | T | C | G | G | G | T | A | A | T | G | G | T | C | A | G | T | A | A | C | T | C | G | G | W | R | C | G | W | G | C | G | C | G | C | G | T | T | A | C | C | A | A | C | A |
| mx066 | G | T  | T  | T  | C  | G  | A  | C | G | G | G | G | C | T | T | C | T | C | T | C | G | G | G | T | A | A | T | G | G | T | C | A | G | T | A | A | C | T | C | G | G | W | R | C | G | W | G | C | G | C | G | C | G | T | T | A | C | C | A | A | C | A |
| mx072 | G | T  | T  | T  | C  | G  | A  | C | G | G | G | G | C | T | T | C | T | C | T | C | G | G | G | T | A | A | T | G | G | T | C | A | G | T | A | A | C | T | C | G | G | W | R | C | G | W | G | C | G | C | G | C | G | T | T | A | C | C | A | A | C | A |
| mx086 | G | T  | T  | T  | C  | G  | A  | C | G | G | G | G | C | T | T | C | T | C | T | C | G | G | G | T | A | A | T | G | G | T | C | A | G | T | A | A | C | T | C | G | G | W | R | C | G | W | G | C | G | C | G | C | G | T | T | A | C | C | A | A | C | A |
| mx091 | G | T  | T  | T  | C  | G  | A  | C | G | G | G | G | C | T | T | C | T | C | T | C | G | G | G | T | A | A | T | G | G | T | C | A | G | T | A | A | C | T | C | G | G | A | A | C | G | A | G | C | G | C | G | C | G | T | T | A | C | C | A | A | C | A |
| mx113 | G | T  | T  | T  | C  | G  | A  | C | G | G | G | G | C | T | T | C | T | C | T | C | G | G | G | T | A | A | T | G | G | T | C | A | G | T | A | A | C | T | C | G | G | W | R | C | G | W | G | C | G | C | G | C | G | T | T | A | C | C | A | A | C | A |
| mx067 | G | T  | T  | T  | C  | G  | A  | C | G | G | G | G | C | T | T | C | T | C | T | C | G | G | G | T | A | A | T | G | G | T | C | A | G | T | A | A | C | T | C | G | G | A | A | C | G | A | G | C | G | C | G | C | G | T | T | A | C | C | A | A | C | A |
| mx014 | G | T  | T  | T  | C  | G  | A  | C | G | G | G | G | C | T | T | C | T | C | T | C | G | G | G | T | A | A | T | G | G | T | C | A | G | T | A | A | C | T | C | G | G | A | A | C | G | A | G | C | G | C | G | C | G | T | T | A | C | C | A | A | C | A |
| mx007 | G | T  | T  | T  | C  | G  | A  | C | G | G | G | G | C | T | T | C | T | C | T | C | G | G | G | T | A | A | T | G | G | T | C | A | G | T | A | A | C | T | C | G | G | A | A | C | G | A | G | C | G | C | G | C | G | T | T | A | C | C | A | A | C | A |
| mx017 | G | T  | T  | T  | C  | G  | A  | C | G | G | G | G | C | T | T | C | T | C | T | C |   |   |   |   |   |   |   |   |   |   |   |   |   |   |   |   |   |   |   |   |   |   |   |   |   |   |   |   |   |   |   |   |   |   |   |   |   |   |   |   |   |   |
